# Supplementary material
Source: PubMed Central journal article supplement (PMC7612379)
Supplement: EMS142130-supplement-Table_S1.pdf [file EMS142130-supplement-Table_S1.pdf]

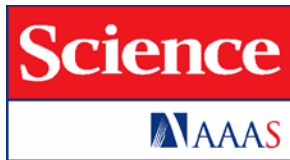

## Supplementary Materials for

### **Driving improvements in emerging disease surveillance through locally relevant capacity strengthening**

Jo E. B. Halliday,\* Katie Hampson, Nick Hanley, Tiziana Lembo,  
Joanne P. Sharp, Daniel T. Haydon, Sarah Cleaveland

\*Corresponding author. Email: jo.halliday@glasgow.ac.uk

Published 14 July 2017, *Science* **357**, 146 (2017)  
DOI: 10.1126/science.aam8332

**This PDF file includes:**

Table S1

**Table S1. Case study to show how actions to achieve control and elimination of rabies, contribute to capacity-strengthening for EID surveillance and achievement of sustainable development goals.** The capacities listed in the second and third columns align to the IHR-PVS (20) and GHSA (21) frameworks respectively.

\*IHR-PVS capacity on zoonoses (10.1) and GHSA Action Package on Zoonotic Diseases (Prevent 2) apply throughout.

| <b>Action on a locally relevant disease: Control and elimination of rabies</b>                                                                                                                                         | <b>Relevant capacities and competencies within IHR-PVS Monitoring Framework*</b>                                                                                                                  | <b>Relevance to Global Health Security Action Packages*</b>                                                                                        | <b>Interactions with Sustainable Development Goals and Targets</b>                                                                                                                                                                                                                                                                                                                               |
|------------------------------------------------------------------------------------------------------------------------------------------------------------------------------------------------------------------------|---------------------------------------------------------------------------------------------------------------------------------------------------------------------------------------------------|----------------------------------------------------------------------------------------------------------------------------------------------------|--------------------------------------------------------------------------------------------------------------------------------------------------------------------------------------------------------------------------------------------------------------------------------------------------------------------------------------------------------------------------------------------------|
| Ensure notifiability of human and animal rabies                                                                                                                                                                        | National legislation and policy, epidemiological surveillance                                                                                                                                     | Detect 2,3: Real-time surveillance                                                                                                                 | SDG 3.d Early warning, risk reduction and management of national and global health risks                                                                                                                                                                                                                                                                                                         |
| Training of human and animal health workers in integrated bite case management and outbreak investigation (required for all suspect exposures when aiming to verify freedom from rabies/ interruption of transmission) | Human resource capacity, including veterinary, para-professionals and other professionals; diagnostic and laboratory capacity; intersectoral coordination; emergency response; risk communication | Detect 1: National laboratory system; Detect 2,3: Real-time surveillance system, multi-sectoral surveillance data; Detect 5: Workforce development | SDG 3.c: Training, retention of health workforce; SDG 3.d Early warning, risk reduction and management of national and global health risks                                                                                                                                                                                                                                                       |
| Interventions: Emergency access to life-saving human vaccines; large-scale mass dog vaccination; washing of animal bite injuries to reduce rabies risk; dog population management                                      | Management of resources and operations; consultation and stakeholder participation; disease prevention, control and eradication; management of resources and operations                           | Prevent-4: Immunization action package; Respond 1: Emergency operations (multi-sectoral response teams)                                            | SDG 3.b: Access to affordable vaccines; SDG 3.8: Achieve universal health coverage, including access to safe, effective, quality and affordable vaccines for all; SDG 3.3: End epidemics of neglected tropical diseases (rabies); SDG 6.2: Achieve access to adequate and equitable sanitation; SDG 11.6: Urban waste management; SDG 15.5: Protect and prevent extinction of threatened species |

|                                                                                                                        |                                                                                                                                     |                                                                 |                                                                                                                                                                      |
|------------------------------------------------------------------------------------------------------------------------|-------------------------------------------------------------------------------------------------------------------------------------|-----------------------------------------------------------------|----------------------------------------------------------------------------------------------------------------------------------------------------------------------|
| Vaccine procurement, distribution and delivery                                                                         | Coordination capability; management of resources and operations; operational funding; forecasting capacity                          | Prevent-4: Immunization action package                          | SDG 3.b: Provide access to affordable vaccines; 3.8: Achieve universal health coverage, including access to safe, effective, quality and affordable vaccines for all |
| Establishment of One Health/Zoonoses coordination units                                                                | Intersectoral coordination; disease prevention, control and eradication; emergency response; management of resources and operations | Respond 1: Emergency operations (multi-sectoral response teams) | SDG 3.c: Training, retention of health workforce; SDG 3.d Early warning, risk reduction and management of national and global health risks                           |
| Detection and diagnosis of human cases of acute encephalitis syndrome (required to validate freedom from human rabies) | Epidemiological (syndromic) surveillance; diagnostic capacity                                                                       | Detect 2,3: Real-time surveillance (syndromic surveillance)     | SDG 3.d Early warning, risk reduction and management of national and global health risks                                                                             |
| Collection, management and analysis of surveillance data                                                               | Epidemiological surveillance; intersectoral coordination; diagnostic capacity                                                       | Detect 2,3: Real-time surveillance                              | SDG 3.d Early warning, risk reduction and management of national and global health risks                                                                             |

## References

1. G. T. Keusch, M. Pappaioanou, M. C. Conzalez, K. A. Scott, P. Tsai, Eds., *Sustaining Global Surveillance and Response to Emerging Zoonotic Diseases*, (National Academies Press, Washington, DC, 2009).
2. D. G. Streicker, A. S. Turmelle, M. J. Vonhof, I. V. Kuzmin, G. F. McCracken, C. E. Rupprecht, Host phylogeny constrains cross-species emergence and establishment of rabies virus in bats. *Science* **329**, 676–679 (2010). [doi:10.1126/science.1188836](https://doi.org/10.1126/science.1188836) [Medline](#)
3. J. O. Lloyd-Smith, D. George, K. M. Pepin, V. E. Pitzer, J. R. C. Pulliam, A. P. Dobson, P. J. Hudson, B. T. Grenfell, Epidemic dynamics at the human-animal interface. *Science* **326**, 1362–1367 (2009). [doi:10.1126/science.1177345](https://doi.org/10.1126/science.1177345) [Medline](#)
4. M. E. J. Woolhouse, S. Gowtage-Sequeria, Host range and emerging and reemerging pathogens. *Emerg. Infect. Dis.* **11**, 1842–1847 (2005). [doi:10.3201/eid1112.050997](https://doi.org/10.3201/eid1112.050997) [Medline](#)
5. K. E. Jones, N. G. Patel, M. A. Levy, A. Storeygard, D. Balk, J. L. Gittleman, P. Daszak, Global trends in emerging infectious diseases. *Nature* **451**, 990–993 (2008). [doi:10.1038/nature06536](https://doi.org/10.1038/nature06536) [Medline](#)
6. S. S. Morse, J. A. Mazet, M. Woolhouse, C. R. Parrish, D. Carroll, W. B. Karesh, C. Zambrana-Torrel, W. I. Lipkin, P. Daszak, Prediction and prevention of the next pandemic zoonosis. *Lancet* **380**, 1956–1965 (2012). [doi:10.1016/S0140-6736\(12\)61684-5](https://doi.org/10.1016/S0140-6736(12)61684-5) [Medline](#)
7. M. E. J. Woolhouse, D. T. Haydon, R. Antia, Emerging pathogens: The epidemiology and evolution of species jumps. *Trends Ecol. Evol.* **20**, 238–244 (2005). [doi:10.1016/j.tree.2005.02.009](https://doi.org/10.1016/j.tree.2005.02.009) [Medline](#)
8. E. H. Chan, T. F. Brewer, L. C. Madoff, M. P. Pollack, A. L. Sonricker, M. Keller, C. C. Freifeld, M. Blench, A. Mawudeku, J. S. Brownstein, Global capacity for emerging infectious disease detection. *Proc. Natl. Acad. Sci. U.S.A.* **107**, 21701–21706 (2010). [doi:10.1073/pnas.1006219107](https://doi.org/10.1073/pnas.1006219107) [Medline](#)
9. S. A. Kluberg, S. R. Mekaru, D. J. McIver, L. C. Madoff, A. W. Crawley, M. S. Smolinski, J. S. Brownstein, Global capacity for emerging infectious disease detection, 1996-2014. *Emerg. Infect. Dis.* **22**, E1–E6 (2016). [doi:10.3201/eid2210.151956](https://doi.org/10.3201/eid2210.151956) [Medline](#)
10. World Health Organization, International health regulations (2005) Third edition. <http://apps.who.int/iris/bitstream/10665/246107/1/9789241580496-eng.pdf?ua=1> [accessed 11 April 2017].
11. F. M. Burkle Jr., Global health security demands a strong international health regulations treaty and leadership from a highly resourced world health organization. *Disaster Med. Public Health Prep.* **9**, 568–580 (2015). [doi:10.1017/dmp.2015.26](https://doi.org/10.1017/dmp.2015.26) [Medline](#)
12. T. L. Bogich, R. Chunara, D. Scales, E. Chan, L. C. Pinheiro, A. A. Chmura, D. Carroll, P. Daszak, J. S. Brownstein, Preventing pandemics via international development: A systems approach. *PLOS Med.* **9**, e1001354 (2012). [doi:10.1371/journal.pmed.1001354](https://doi.org/10.1371/journal.pmed.1001354) [Medline](#)

13. J. A. Patz, P. Daszak, G. M. Tabor, A. A. Aguirre, M. Pearl, J. Epstein, N. D. Wolfe, A. M. Kilpatrick, J. Foufopoulos, D. Molyneux, D. J. Bradley, D. Emergence; Working Group on Land Use Change and Disease Emergence, Unhealthy landscapes: Policy recommendations on land use change and infectious disease emergence. *Environ. Health Perspect.* **112**, 1092–1098 (2004). [doi:10.1289/ehp.6877](https://doi.org/10.1289/ehp.6877) [Medline](#)
14. P. Hitchcock, A. Chamberlain, M. Van Wagoner, T. V. Inglesby, T. O’Toole, Challenges to global surveillance and response to infectious disease outbreaks of international importance. *Biosecur. Bioterror.* **5**, 206–227 (2007). [doi:10.1089/bsp.2007.0041](https://doi.org/10.1089/bsp.2007.0041) [Medline](#)
15. R. G. Vaz, P. Mkanda, R. Banda, W. Komkech, O. O. Ekundare-Famiyesin, R. Onyibe, S. Abidoye, P. Nsubuga, S. Maleghemi, B. Hannah-Murele, S. G. Tegegne, The role of the polio program infrastructure in response to Ebola virus disease outbreak in Nigeria 2014. *J. Infect. Dis.* **213** (suppl. 3), S140–S146 (2016). [doi:10.1093/infdis/jiv581](https://doi.org/10.1093/infdis/jiv581) [Medline](#)
16. J. C. Mariner, J. A. House, C. A. Mebus, A. E. Sollod, D. Chibeu, B. A. Jones, P. L. Roeder, B. Admassu, G. G. van ’t Klooster, Rinderpest eradication: Appropriate technology and social innovations. *Science* **337**, 1309–1312 (2012). [doi:10.1126/science.1223805](https://doi.org/10.1126/science.1223805) [Medline](#)
17. J. Frenk, The global health system: Strengthening national health systems as the next step for global progress. *PLOS Med.* **7**, e1000089 (2010). [doi:10.1371/journal.pmed.1000089](https://doi.org/10.1371/journal.pmed.1000089) [Medline](#)
18. K. Bardosh, Global aspirations, local realities: The role of social science research in controlling neglected tropical diseases. *Infect. Dis. Poverty* **3**, 35 (2014). [doi:10.1186/2049-9957-3-35](https://doi.org/10.1186/2049-9957-3-35) [Medline](#)
19. R. C. Swanson, R. Atun, A. Best, A. Betigeri, F. de Campos, S. Chunharas, T. Collins, G. Currie, S. Jan, D. McCoy, F. Omaswa, D. Sanders, T. Sundararaman, W. Van Damme, Strengthening health systems in low-income countries by enhancing organizational capacities and improving institutions. *Global. Health* **11**, 5 (2015). [doi:10.1186/s12992-015-0090-3](https://doi.org/10.1186/s12992-015-0090-3) [Medline](#)
20. World Health Organization, World Organization for Animal Health, Handbook for the assessment of capacities at the human-animal interface. [http://www.who.int/ihr/publications/handbook\\_OMS\\_OIE/en/](http://www.who.int/ihr/publications/handbook_OMS_OIE/en/) [accessed 11 April 2017].
21. Global Health Security Agenda, <https://www.ghsagenda.org> [accessed 11 April 2017].
22. R. D. Horan, E. P. Fenichel, Economics and ecology of managing emerging infectious animal diseases. *Am. J. Agric. Econ.* **89**, 1232–1238 (2007). [doi:10.1111/j.1467-8276.2007.01089.x](https://doi.org/10.1111/j.1467-8276.2007.01089.x)
23. T. N. Cason, R. M. Sheremeta, J. J. Zhang, Communication and efficiency in competitive coordination games. *Games Econ. Behav.* **76**, 26–43 (2012). [doi:10.1016/j.geb.2012.05.001](https://doi.org/10.1016/j.geb.2012.05.001)
24. B. White, N. Hanley, Should we pay for ecosystem service outputs, inputs or both? *Environ. Resour. Econ.* **63**, 765–787 (2016). [doi:10.1007/s10640-016-0002-x](https://doi.org/10.1007/s10640-016-0002-x)
25. Z. Mtema, J. Chungalucha, S. Cleaveland, M. Elias, H. M. Ferguson, J. E. Halliday, D. T. Haydon, G. Jaswant, R. Kazwala, G. F. Killeen, T. Lembo, K. Lushasi, A. D. Malishee,

- R. Mancy, M. Maziku, E. M. Mbunda, G. J. Mchau, R. Murray-Smith, K. Rysava, K. Said, M. Sambo, E. Shayo, L. Sikana, S. E. Townsend, H. Urassa, K. Hampson, Mobile phones as surveillance tools: Implementing and evaluating a large-scale intersectoral surveillance system for rabies in Tanzania. *PLOS Med.* **13**, e1002002 (2016). [doi:10.1371/journal.pmed.1002002](https://doi.org/10.1371/journal.pmed.1002002) [Medline](#)
26. Z. Chisha, D. A. Larsen, M. Burns, J. M. Miller, J. Chirwa, C. Mbwili, D. J. Bridges, M. Kamuliwo, M. Hawela, K. R. Tan, A. S. Craig, A. M. Winters, Enhanced surveillance and data feedback loop associated with improved malaria data in Lusaka, Zambia. *Malar. J.* **14**, 222 (2015). [doi:10.1186/s12936-015-0735-y](https://doi.org/10.1186/s12936-015-0735-y) [Medline](#)
27. World Health Organization, Ebola response: What needs to happen in 2015. <http://www.who.int/csr/disease/ebola/one-year-report/response-in-2015/en/> [accessed 01 April 2017].
28. N. B. Kabatereine, M. Malecela, M. Lado, S. Zaramba, O. Amiel, J. H. Kolaczinski, How to (or not to) integrate vertical programmes for the control of major neglected tropical diseases in sub-Saharan Africa. *PLOS Negl. Trop. Dis.* **4**, e755 (2010). [doi:10.1371/journal.pntd.0000755](https://doi.org/10.1371/journal.pntd.0000755) [Medline](#)
29. P. Farmer, *Infections and Inequalities: The Modern Plagues* (University of California Press, Berkeley; London, ed. Updated ed. with a new preface, 2001).
30. UNU-IHDP, UNEP, *Inclusive Wealth Report 2014. Measuring Progress Toward Sustainability. Summary for Decision-Makers* (UNU-IHDP, Delhi, 2014).
31. M. Nilsson, D. Griggs, M. Visbeck, Policy: Map the interactions between sustainable development goals. *Nature* **534**, 320–322 (2016). [doi:10.1038/534320a](https://doi.org/10.1038/534320a) [Medline](#)
